# Supplementary material for: The ABRF Metabolomics Research Group 2016 Exploratory Study: Investigation of Data Analysis Methods for Untargeted Metabolomics
Source: MDPI journal article supplement (doi:10.3390/metabo10040128), 2020-03-27
Supplement: s1 [file s1]

Data:

The RAW data from the XCMS spreadsheets were feature wise median centered and logarithmised for the statistical analysis.

A T-test model was calculated using Profile.Analysis 2.1 from Bruker Daltonics.

To find the Top 50 changed metabolic features, the data was filtered according to the uncorrected p-value ( $p \geq 0.001$ ; 1 out of 1000 is a false positive). Further the remaining features were sorted by their FDR value (Yes  $\leq 0.05$ ; No  $> 0.05$ ) and the absolute ratio. From this list the first 50 were selected.

The absolute ratio was calculated using the data that was normalized to the respective internal standard.

m/z were looked up using excel in a database containing all entries from the HMDB early 2016 (only M+H or M-H).

For visualization RStudio (0.99.902) with R (3.3.1) was used:

PCA was created using the package pcaMethods 1.64.0
